# Supplementary material for: Patient engagement partnerships in clinical trials (PEP-CT): protocol for the systematic development and testing of patient partner and investigator decision aids
Source: HighWire-hosted journal article supplement (doi:10.1136/bmjopen-2021-060267), 2022-02-01
Supplement: bmjopen-2021-060267supp001_data_supplement.pdf [file bmjopen-2021-060267supp001_data_supplement.pdf]

## Supplemental Material

### Patient Decision Aid

## Patient Decision Aid

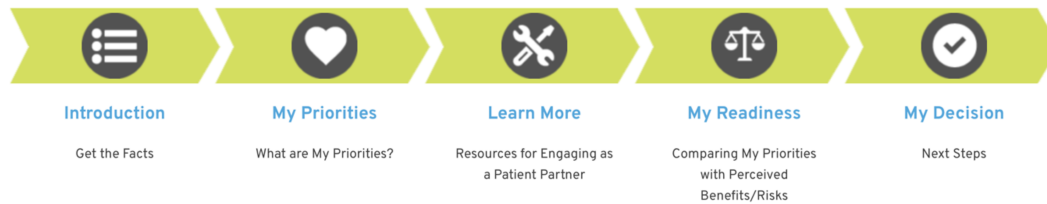

<https://www.ctontario.ca/patients-public/resources-for-engaging-patients/patient-decision-aid/>

### Investigator Decision Aid

## Investigator Decision Aid

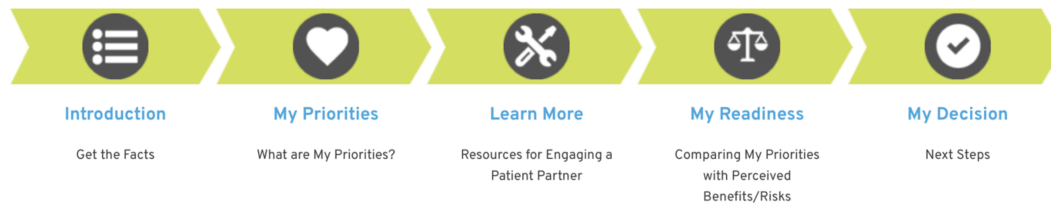

<https://www.ctontario.ca/patients-public/resources-for-engaging-patients/investigator-decision-aid/>
